# Supplementary material for: Meaning Making as a Lifebuoy in Dementia Caregiving: Predicting Depression from a Generation Perspective Using a Fuzzy-Set Qualitative Comparative Analysis
Source: MDPI journal article supplement (doi:10.3390/ijerph192315711), 2022-11-25
Supplement: s1 [file s1]

**Table S1.** An example of contrarian case analysis for depressive symptoms at follow-up and a sense of loss/powerlessness.

|                                                                                                      |       |       | Percentile Group of<br>Depressive symptoms at follow-up |       |       |       |        |        |
|------------------------------------------------------------------------------------------------------|-------|-------|---------------------------------------------------------|-------|-------|-------|--------|--------|
|                                                                                                      |       |       | 1                                                       | 2     | 3     | 4     | 5      | Total  |
| Percentile<br>Group of<br>Sense of loss/<br>powerlessness<br>(phi <sup>2</sup> = 0.69,<br>p < 0.001) | 1     | Count | 20                                                      | 10    | 6     | 4     | 1      | 41     |
|                                                                                                      |       | (%)   | 48.8%                                                   | 24.4% | 14.6% | 9.8%  | 2.4%   | 100.0% |
|                                                                                                      | 2     | Count | 20                                                      | 7     | 8     | 8     | 3      | 46     |
|                                                                                                      |       | (%)   | 43.5%                                                   | 15.2% | 17.4% | 17.4% | 6.5%   | 100.0% |
|                                                                                                      | 3     | Count | 4                                                       | 3     | 14    | 2     | 4      | 27     |
|                                                                                                      |       | (%)   | 14.8%                                                   | 11.1% | 51.9% | 7.4%  | 14.8%  | 100.0% |
|                                                                                                      | 4     | Count | 2                                                       | 2     | 9     | 9     | 6      | 28     |
|                                                                                                      |       | (%)   | 7.1%                                                    | 7.1%  | 32.1% | 32.1% | 21.4%  | 100.0% |
|                                                                                                      | 5     | Count | 0                                                       | 1     | 4     | 6     | 14     | 25     |
|                                                                                                      |       | (%)   | 0.0%                                                    | 4.0%  | 16.0% | 24.0% | 56.0%  | 100.0% |
| Total                                                                                                | Count | 46    | 23                                                      | 41    | 29    | 28    | 167    |        |
|                                                                                                      | (%)   | 27.5% | 13.8%                                                   | 24.6% | 17.4% | 16.8% | 100.0% |        |

Note. Numbers in (%) are within the percentile group of sense of loss/powerlessness.  
Numbers in bold boxes are the contrarian case numbers.

**Table S2.** Reliability and correlation matrix.

| Variable                            | Cronbach's Alpha | <i>M (SD)</i> | 1         | 2         | 3          | 4         | 5          | 6          | 7         | 8        | 9         | 10 |
|-------------------------------------|------------------|---------------|-----------|-----------|------------|-----------|------------|------------|-----------|----------|-----------|----|
| 1. Depressive symptoms at follow-up | 0.915            | 4.86 (5.37)   | -         |           |            |           |            |            |           |          |           |    |
| 2. Generation                       | -                | -             | -0.119    | -         |            |           |            |            |           |          |           |    |
| 3. Sense of loss/powerlessness      | 0.888            | 57.31 (9.87)  | 0.493 *** | -0.201 ** | -          |           |            |            |           |          |           |    |
| 4. Sense of provisional meaning     | 0.931            | 70.81 (9.36)  | -0.030    | 0.069     | -0.051     | -         |            |            |           |          |           |    |
| 5. Caregiver burden                 | 0.763            | 11.16 (2.90)  | 0.422 *** | -0.210 ** | 0.619 ***  | -0.104    | -          |            |           |          |           |    |
| 6. Depressive symptoms at baseline  | 0.866            | 3.46 (4.05)   | 0.516 *** | -0.005    | 0.500 ***  | -0.180 *  | 0.443 ***  | -          |           |          |           |    |
| 7. Caregiver distress               | 0.900            | 13.71 (9.82)  | 0.397 *** | -0.070    | 0.403 ***  | -0.011    | 0.456 ***  | 0.428 ***  | -         |          |           |    |
| 8. Resilience                       | 0.923            | 35.22 (6.58)  | -0.238 ** | -0.159    | -0.297 *** | 0.464 *** | -0.310 *** | -0.359 *** | -0.179 *  | -        |           |    |
| 9. Adaptation                       | -                | -             | 0.284 *** | -0.079    | 0.157*     | 0.046     | 0.258 ***  | 0.163*     | 0.386 *** | -0.102   | -         |    |
| 10. NPS severity                    | 0.855            | 11.60 (6.77)  | 0.328 *** | -0.015    | 0.321 ***  | 0.018     | 0.390 ***  | 0.377 ***  | 0.840 *** | -0.166 * | 0.331 *** | -  |

Note. *M* and *SD* are used to represent mean and standard deviation, respectively. \*  $p < 0.05$ , \*\*  $p < 0.01$ , \*\*\*  $p < 0.001$ . NPS = Neuropsychiatric Symptoms.
